# Supplementary material for: 2022 KLCA-NCC Korea practice guidelines for the management of hepatocellular carcinoma
Source: PubMed Central journal article supplement — J Liver Cancer. 2022 Dec 9;23(1):1–120. doi: 10.17998/jlc.2022.11.07 (PMC10202234; doi:10.17998/jlc.2022.11.07), 2022-12-09
Supplement: jlc-2022-11-07-app1.pdf [file jlc-2022-11-07-app1.pdf]

## APPENDIX 1. 2022 KLCA–NCC KOREA PRACTICE GUIDELINE REVISION COMMITTEE (KPGRC)

### Chairman

Joong-Won Park (Hepatology, National Cancer Center Korea)

Head of Department: Moon Suk Choi (Hepatology, Sungkyunkwan University), Kyung-Suk Suh (Surgery, Seoul National University), Jin Wook Chung (Radiology, Seoul National University), Jinsil Seong (Radiation Oncology, Yonsei University)

### Members

Internal Medicine: Do Young Kim (Hepatology, Yonsei University), Bo Hyun Kim (Hepatology, National Cancer Center Korea), Ji Hoon Kim (Hepatology, Korea University), Baek-Yeol Ryoo (Hepatology, Ulsan University), Dong Hyun Sinn (Hepatology, Sungkyunkwan University), Joo Hyeon Shim (Hepatology, Ulsan University), Sung Won Lee (Hepatology, Catholic University of Korea), Jeong Hoon Lee

(Hepatology, Seoul National University), Hyun Woong Lee (Hepatology, Yonsei University), Ho Yeong Lim (Oncology, Sungkyunkwan University), Jeong Won Jang (Hepatology, Catholic University of Korea), Yuri Cho (Hepatology, National Cancer Center Korea)

Surgery: Dong-Sik Kim (Korea University), Jong Man Kim (Sungkyunkwan University), Ji Hoon Kim (National Cancer Center Korea), Jae Do Yang (Jeonbuk National University), Young In Yoon (Ulsan University), Jae Keun Lee (Yonsei University), Hae Won Lee (Seoul National University), Ho Joong Choi (Catholic University of Korea), Suk Kyun Hong (Seoul National University)

Radiology: Young Hwan Koh (National Cancer Center, Korea), Min Woo Lee (Sungkyunkwan University), Sunyoung Lee (Yonsei University), In Joon Lee (National Cancer Center Korea), Jeong Min Lee (Seoul National University), Ijin Joo (Seoul National University), Ho Jong Chun (Catholic University of Korea), Sang Hyun Choi (Ulsan University)

Radiation Oncology: Tae Hyun Kim (National Cancer Center Korea), Hee Chul Park (Sungkyunkwan University), Sun Hyeon Bae (Soon Chun Hyang University), Sang Min Yoon (Ulsan University), Chai Hong Rim (Korea University), Won Il Jang (Korea Cancer Center Hospital)
