# Supplementary material for: 2022 KLCA-NCC Korea practice guidelines for the management of hepatocellular carcinoma
Source: PubMed Central journal article supplement — J Liver Cancer. 2022 Dec 9;23(1):1–120. doi: 10.17998/jlc.2022.11.07 (PMC10202234; doi:10.17998/jlc.2022.11.07), 2022-12-09
Supplement: jlc-2022-11-07-app2.pdf [file jlc-2022-11-07-app2.pdf]

## APPENDIX 2. DISCLOSURE OF CONFLICT OF INTEREST IN THE PAST 2 YEARS

Chairman: Joong-Won Park reports sponsored lectures for Roche, Ipsen, Bayer, Eisai; consultant/advisory roles for AstraZeneca, Roche, Genetech, Bigene, Bayer, Eutilex, Genexine, Onconic; and research grants from AstraZeneca, Roche, BMS, ONO, Exelixis, MSD-Merck.

Internal Medicine: Moon Suk Choi reports none. Do Young Kim reports none. Bo Hyun Kim reports an advisory role for Eisai, Roche; receiving honoraria from Eisai; and participating in research sponsored by Ono-BMS, Hanmi. Ji Hoon Kim reports sponsored lectures for Gilead, Abbvie, Yuhan, Dong-A ST, Daewoong; advisory role for Gilead, Abbvie, Roche, Dong-A ST; and research grants from Gilead, Celltrion, NOVONO, Daewoong, BMS. Baek-Yeol Ryoo reports none. Dong Hyun Sinn reports sponsored lectures for Bayer and participation in research sponsored by Bayer. Joo Hyeon Shim reports none. Sung Won Lee reports consultant and advisory roles for Eisai, Gilead, Abbvie, GC Cell. Jeong Hoon Lee reports sponsored lectures for BMS Korea, Eisai Korea, Samil Pharmaceutical Company and research grants from Yuhan Pharmaceutical Company, GreenCrossCell. Hyun Woong Lee reports sponsored lectures for Gilead, BMS, Abbvie, Chong Kun Dang, Yuhan, Dong-A, Daewoong; consultant/advisory roles for GC Cell; and participation in clinical trials from Gilead, Abbvie, Chong Kun Dang, Yuhan, Dong-A. Ho Yeong Lim reports advisory roles for Bayer, Eisai, Roche, Ipsen and participation in clinical trials from Bayer, Eisai, MSD, Roche, Ipsen, BMS. Jeong Won Jang reports honoraria from Gilead, Abbvie, Bayer, Roche, Sysmex, Ipsen and grants from Sysmex, Gilead, Yuhan, Dong-A ST, Hanmi. Yuri Cho reports none.

Surgery: Kyung-Suk Suh reports none. Dong-Sik Kim reports none. Jong Man Kim reports sponsored lecture for Chong Kun Dang, Johnson & Johnson, Greencross, Astellas, Novartis; advisory role for Roche; and participation in clinical trials from Chon Kun Dang, Greencross, Greencross Labcell, SK Plasma. Ji Hoon Kim reports none. Jae Do Yang reports none. Young In Yoon reports none. Jae Keun Lee

reports none. Hae Won Lee reports none. Ho Joong Choi reports none. Suk Kyun Hong is a shareholder and an advisory board member of GENOME INSIGHT Inc.

Radiology: Jin Wook Chung reports sponsored lecture for Guerbet and participation in clinical trials from MSD, Parmicell. Young Hwan Koh reports none. Min Woo Lee reports sponsored lectures for Bracco, Boston scientific, RF medical; consultant/advisory role for STARmed; and participation in a clinical trial from STARmed. Sunyoung Lee reports none. In Joon Lee reports sponsored lectures for Guerbet Korea. Jeong Min Lee reports grants from Bayer Healthcare, Canon Healthcare, Philips Healthcare, GE Healthcare, CMS, Dongkuk Pharma, Guerbet, Samsung Medison, Bracco, RF Medical, Starmed and personal fees from Bayer Healthcare, Siemens Healthineer, Samsung Medison, Guerbet, Philips, outside the submitted work. Ijin Joo reports sponsored lecture for Samsung Medicine, Bayer, Bracco and participation in clinical trials from Samsung Medicine. Ho Jong Chun reports none. Sang Hyun Choi reports none.

Radiation Oncology: Jinsil Seong reports none. Tae Hyun Kim reports none. Hee Chul Park reports none. Sun Hyeon Bae reports none. Sang Min Yoon reports none. Chai Hong Rim reports none. Won Il Jang reports none.

Delphi Committee: Yoon Jun Kim sponsored lectures for BMS, MSD, Abbvie, Bayer; consultant/advisory roles for Celltrion, Bukwang; research grant support from BTG, Boston Scientific, AstraZeneca, Gilead Sciences, Samjin, BL&H, Bayer; and participation in clinical trials from Gilead, BTG, GSK, MSD, Cymabay, Roche, Boehringer Ingelheim, Galectin, Intercept, Pfizer, Arbutus, Abbvie, Ildong, Hanmi, Creagen, AstraZeneca, PharmaKing. Tae-Yong Kim reports none. Soo Young Park reports none. Changhoon Yoo reports none. Young-Suk Lim serves as advisor/consultant/speaker for AbbVie, Arbutus Biopharma, Assembly Biosciences, Bria Biosciences, Bayer Healthcare, GlaxoSmithKline, Gilead Sciences, Janssen, Olix Pharmaceuticals, Roche, Vaccitech, Vir Biotechnology and received grant/research support from Gilead Sciences. Hyung Joon Yim reports sponsored lectures for Gilead, Abbvie, Hanmi, Yuhan and participation in clinical trials from Gilead, Daewoong, GSK, Hanmi, Il Dong Pharm.

Jae Young Jang reports none. Hong Jae Chon reports sponsored lecture for Roche, Bayer, BMS; consultant/advisory roles for Roche, ONO, BMS, Eisai, Bayer, MSD, AstraZene-

ca; research grants from Roche; and participation in clinical trials from, Roche, BMS, ONO, MSD, Amgen. Jung Yong Hong reports none.
