# Supplementary material for: 2022 KLCA-NCC Korea practice guidelines for the management of hepatocellular carcinoma
Source: PubMed Central journal article supplement — J Liver Cancer. 2022 Dec 9;23(1):1–120. doi: 10.17998/jlc.2022.11.07 (PMC10202234; doi:10.17998/jlc.2022.11.07), 2022-12-09
Supplement: jlc-2022-11-07-app4.pdf [file jlc-2022-11-07-app4.pdf]

## APPENDIX 4. DELPHI ROUND AGREEMENT ON THE RECOMMENDATIONS OF SYSTEMIC THER- APY

The Delphi Panel rated each recommendation on a 9-point Likert scale from 1 (strongly disagree) to 9 (strongly

agree). The mean value of each recommendation was calculated and categorized as appropriate ( $\geq 7$ ), uncertain ( $4.0 < 7$ ), or inappropriate ( $< 4$ ). A coefficient of variance  $\geq 0.5$  indicated non-consensus and the need for revision. The Delphi Panel agreement on each of the final recommendations of systemic therapy is as below.

|                                        | Recommendations                                                                                                                                                                                                                                                                                                                                                                                    | Mean | Coefficient of variance |
|----------------------------------------|----------------------------------------------------------------------------------------------------------------------------------------------------------------------------------------------------------------------------------------------------------------------------------------------------------------------------------------------------------------------------------------------------|------|-------------------------|
| 1st line systemic therapies            | 1. Atezolizumab plus bevacizumab or durvalumab plus tremelimumab is recommended for systemic treatment-naïve patients with locally advanced unresectable or metastatic HCC not amenable to curative or loco-regional therapy who have Child-Pugh class A and ECOG performance status 0–1 (A1). If these two combination therapies cannot be applied, sorafenib or lenvatinib is recommended (A1).  | 9.00 | 0.00                    |
|                                        | 2. Sorafenib is considered for patients with HCC who have Child-Pugh class B7 (B1) or B8–9 (B2) if other conditions listed in Recommendation 1 are met.                                                                                                                                                                                                                                            | 8.67 | 0.06                    |
| 2nd line systemic therapies            | 1. Regorafenib is recommended for patients with progressive HCC after at least 3 weeks of sorafenib ( $\geq 400$ mg/day) treatment and with Child-Pugh class A and good performance status (ECOG score 0–1) (A1).                                                                                                                                                                                  | 8.67 | 0.08                    |
|                                        | 2. Cabozantinib is recommended for patients with progressive HCC after first-line sorafenib or second-line systemic treatment and with Child-Pugh class A and good performance status (ECOG score 0–1) (A1).                                                                                                                                                                                       | 8.44 | 0.10                    |
|                                        | 3. Ramucirumab is recommended for patients with progressive HCC after sorafenib or intolerance to sorafenib and with Child-Pugh class A, good performance status (ECOG score 0–1), and serum AFP level $\geq 400$ ng/mL (A1).                                                                                                                                                                      | 8.67 | 0.08                    |
|                                        | 4. Pembrolizumab is recommended for patients with progressive HCC after sorafenib or intolerance to sorafenib and with Child-Pugh class A and good performance status (ECOG score 0–1) (B1).                                                                                                                                                                                                       | 8.44 | 0.09                    |
|                                        | 5. Either nivolumab plus ipilimumab combination therapy (B1) or nivolumab monotherapy (C1) can be considered for patients with progressive HCC after sorafenib or intolerance to sorafenib and with Child-Pugh class A and good performance status (ECOG score 0–1).                                                                                                                               | 7.67 | 0.07                    |
|                                        | 6. Sorafenib, regorafenib, cabozantinib, ramucirumab (if serum AFP level $\geq 400$ ng/mL), atezolizumab/bevacizumab, durvalumab/tremelimumab, pembrolizumab, nivolumab/ipilimumab, or nivolumab treatment can be tried for patients with progressive HCC after lenvatinib (D1).                                                                                                                   | 7.67 | 0.13                    |
|                                        | 7. Sorafenib, lenvatinib, regorafenib, cabozantinib, durvalumab/tremelimumab, or nivolumab/ipilimumab can be tried for patients with progressive HCC after combination therapy with atezolizumab plus bevacizumab (D1).                                                                                                                                                                            | 7.67 | 0.13                    |
|                                        | 8. Sorafenib, lenvatinib, regorafenib, cabozantinib, ramucirumab (if serum AFP level $\geq 400$ ng/mL), or atezolizumab/bevacizumab can be tried for patients with progressive HCC after combination therapy with durvalumab plus tremelimumab (D1).                                                                                                                                               | 7.44 | 0.14                    |
| Hepatic arterial infusion chemotherapy | 1. HAIC may be considered for advanced HCC patients with preserved liver function and portal vein invasion without extrahepatic spread for whom first-line or second line systemic therapies, such as atezolizumab-bevacizumab, durvalumab-tremelimumab, sorafenib, lenvatinib, regorafenib, cabozantinib, ramucirumab, nivolumab-ipilimumab, or pembrolizumab, has failed or cannot be used (C2). | 6.89 | 0.18                    |

HCC, hepatocellular carcinoma; ECOG, Eastern Cooperative Oncology Group; AFP, alpha-fetoprotein.
