# Supplementary material for: 2022 KLCA-NCC Korea practice guidelines for the management of hepatocellular carcinoma
Source: PubMed Central journal article supplement — J Liver Cancer. 2022 Dec 9;23(1):1–120. doi: 10.17998/jlc.2022.11.07 (PMC10202234; doi:10.17998/jlc.2022.11.07), 2022-12-09
Supplement: jlc-2022-11-07-app5.pdf [file jlc-2022-11-07-app5.pdf]

## APPENDIX 5. REVISION TIMELINE OF 2022 KLCA-NCC KOREA PRACTICE GUIDELINES FOR THE MANAGEMENT OF HEPATOCELLULAR CARCINOMA

July 5, 2003 Established 2003 KLCSSG-NCC Korea Practice Guidelines for the Management of Hepatocellular Carcinoma

June 27, 2009 Revised 2009 KLCSSG-NCC Korea Practice Guidelines for the Management of Hepatocellular Carcinoma

June 14, 2014 Revised 2014 KLCSSG-NCC Korea Practice Guidelines for the Management of Hepatocellular Carcinoma

May 2015 Published the English version of 2014 Guidelines in Gut and Liver and Korean Journal of Radiology

June 15, 2018 Presented the Korean version of 2018 KLCA-NCC Practice Guidelines for the Management of Hepatocellular Carcinoma (Liver Week, Grand Hyatt Incheon)

May 2019 Published the English version of 2018 Guidelines in Gut and Liver and Korean Journal of Radiology

September 2021 Prepared NCC research fund (Principal Investigator: Joong-Won Park, Project No. 2112570-2) after obtaining the consent of NCC regarding the proposal for the revision of the guidelines by KLCA (Chairman: Kwang Cheol Koh) and formed the KPGRC (Appendix 1) and the Delphi committee

October 12, 2021 Initial meeting of the 2022 KPGRC (online)

October-December 2021 Established the first draft after several meetings in each department, and conducted the first

review for “systemic therapy” in the Delphi committee

January 8, 2022 1st general meeting of 2022 KPGRC (Seoul National University Hospital Cancer Research Institute, 1F Auditorium)

February 19, 2022 2nd general meeting of 2022 KPGRC (Seoul National University Hospital Cancer Research Institute, 1F Auditorium)

March 24, 2022 1st department head meeting (online)

April 7, 2022 2nd department head meeting (online)

April 28, 2022 Advisory Board review

Advisory Board: Kwang Cheol Koh (Sungkyunkwan University, Internal Medicine), Kyung Sik Kim (Yonsei University, Surgery), Tae Yoo Kim (Seoul National University, Internal Medicine), Young Nyeon Park (Yonsei University, Pathology), Si Hyun Bae (Catholic University of Korea, Internal Medicine), Won Jae Lee (Sungkyunkwan University, Radiology), June Sung Lee (Inje University, Internal Medicine), Joon Hyeok Lee (Sungkyunkwan University, Internal Medicine), Han Chu Lee (Ulsan University, Internal Medicine), Hyunchul Rhim (Sungkyunkwan University, Radiology), Won Young Tak (Kyungpook University, Internal Medicine)

May 19, 2022 Public meeting (online)

June 2022 Final draft approved by the board of directors of KLCA and NCC

June 24, 2022 Presented the Korean version of 2022 KLCA-NCC Practice Guidelines for the Management of Hepatocellular Carcinoma (16th conference of KLCA, Grand Intercontinental Seoul Parnas)

September 2022 Submitted the English version of 2022 Guidelines in Clinical and Molecular Hepatology and Korean Journal of Radiology
